# Supplementary material for: Perceived Burden Due to Registrations for Quality Monitoring and Improvement in Hospitals: A Mixed Methods Study
Source: PubMed Central journal article supplement (PMC9278598; doi:10.34172/ijhpm.2020.96), 2020-07-04
Supplement: ijhpm-11-183-s002.pdf [file ijhpm-11-183-s002.pdf]

## Supplementary file 2

**Table S1.** Number of Quality Indicators and Underlying Variables Demanded by Stakeholders in 2017

| Stakeholder                                                                | Intensive Care Unit |           | Prostate cancer |           | Gastrointestinal cancer |           | Haematology department |           | Elderly patients |           |
|----------------------------------------------------------------------------|---------------------|-----------|-----------------|-----------|-------------------------|-----------|------------------------|-----------|------------------|-----------|
|                                                                            | Indicators          | Variables | Indicators      | Variables | Indicators              | Variables | Indicators             | Variables | Indicators       | Variables |
| <b>Government</b>                                                          |                     |           |                 |           |                         |           |                        |           |                  |           |
| Health and Youth Care Inspectorate                                         | 11                  | 77        | 14              | 101       | 18                      | 108       | 12                     | 98        | 8                | 66        |
| National Health Care Institute                                             | 8                   | 29        | 9               | 52        | 12                      | 32        |                        |           | 6                | 14        |
| <b>Accreditation Institutes</b>                                            |                     |           |                 |           |                         |           |                        |           |                  |           |
| NIAZ                                                                       |                     |           | 1               | 492       | 1                       | *         |                        |           |                  |           |
| JACIE                                                                      |                     |           |                 |           |                         |           | 1                      | 1532      |                  |           |
| <b>Insurers</b>                                                            |                     |           | 6               | 23        | 48                      | 140       |                        |           |                  |           |
| <b>Professional Association</b>                                            |                     |           |                 |           |                         |           |                        |           |                  |           |
| Visitation of the Netherlands Association for Intensive care (NVIC)        | 1                   | 256       |                 |           |                         |           |                        |           |                  |           |
| Visitation of the Netherlands Association for Urology (NVU)                |                     |           | 1               | 301       |                         |           |                        |           |                  |           |
| Visitation of the Netherlands Association for Surgery (NVH)                |                     |           |                 |           | 1                       | 191       |                        |           |                  |           |
| Visitation of the Netherlands Association for Internists (NIV)             |                     |           |                 |           |                         |           | 1                      | 66        |                  |           |
| Institute oncological collaboration (SONCOS)                               |                     |           | 21              | 22        | 26                      | 41        | 1                      | 2         |                  |           |
| Association of primary care referrers ( <i>Klankbordgroep verwijzers</i> ) |                     |           |                 |           |                         |           | 1                      | 10        |                  |           |
| Netherlands Federation of University Medical Centres (NFU)                 |                     |           |                 |           |                         |           | 2                      | 122       |                  |           |
| <b>Medical registrations</b>                                               |                     |           |                 |           |                         |           |                        |           |                  |           |
| National Intensive Care Evaluation (NICE) registry                         | 28                  | 234       |                 |           |                         |           |                        |           |                  |           |
| Registration of the Netherlands Society for Urology (NVU)                  |                     |           | 12              | 117       |                         |           |                        |           |                  |           |
| Netherlands Comprehensive Cancer Organisation (IKNL)                       |                     |           | 6               | 99        | 6                       | 191       |                        |           |                  |           |

|                                                                                                            |     |      |    |      |     |      |    |      |    |     |
|------------------------------------------------------------------------------------------------------------|-----|------|----|------|-----|------|----|------|----|-----|
| Dutch Upper GI Cancer Audit (DUCA)                                                                         |     |      |    |      | 22  | 83   |    |      |    |     |
| Dutch ColoRectal Audit (DCRA)                                                                              |     |      |    |      | 10  | 97   |    |      |    |     |
| Registrations for the Netherlands Society for Internists (NIV)                                             |     |      |    |      |     |      | 3  | 84   | 7  | 42  |
| European Society for Blood and Marrow Transplantation (EBMT) database                                      |     |      |    |      |     |      | 3  | 23   |    |     |
| <b>Patient organisation</b>                                                                                |     |      |    |      |     |      |    |      |    |     |
| Certificate for senior friendly hospitals                                                                  |     |      | 1  | 17   | 1   | *    |    |      | 1  | 106 |
| Standards from the stoma foundation                                                                        |     |      |    |      | 1   | 14   |    |      |    |     |
| Hematon (organisation for patients with haematological cancer and patients with stem cell transplantation) |     |      |    |      |     |      | 14 | 17   |    |     |
| <b>Board of directors</b>                                                                                  | 26  | 503  | 1  | 411  | 14  | 402  | 28 | 217  | 12 | 118 |
| <b>Professional driven data</b>                                                                            | 28  | 339  |    |      |     |      | 8  | 12   |    |     |
| <b>Total</b>                                                                                               | 102 | 1438 | 86 | 1636 | 160 | 1299 | 74 | 2183 | 34 | 346 |

\*hospital-wide accreditations are counted once (see prostate cancer)

**Table S2.** Number and Characteristics of Quality Registrations

|                                        | <b>Intensive Care Unit</b> | <b>Prostate cancer</b> | <b>Gastrointestinal cancer</b> | <b>Haematology department</b> | <b>Elderly patients</b> | <b>Mean</b> |
|----------------------------------------|----------------------------|------------------------|--------------------------------|-------------------------------|-------------------------|-------------|
| <b>Number of stakeholders</b>          | 6                          | 10                     | 12                             | 11                            | 5                       | 8.8         |
| <b>Number of quality registrations</b> | 102                        | 86                     | 160                            | 74                            | 34                      | 91          |
| <b>Number of underlying variables</b>  | 1438                       | 1636                   | 1299                           | 2183                          | 346                     | 1380        |
| <b>% overlap at indicator level</b>    | 48%                        | 51%                    | 49%                            | 41%                           | 36%                     | 47%         |
| <b>% overlap at the variable level</b> | 37%                        | 16%                    | 46%                            | 17%                           | 49%                     | 28%         |

|                                                                 |     |     |     |     |     |      |
|-----------------------------------------------------------------|-----|-----|-----|-----|-----|------|
| <b>Primary aim of the registration</b>                          |     |     |     |     |     |      |
| - <b>Accountability purposes</b>                                | 20% | 58% | 65% | 15% | 41% | 44%  |
| - <b>Accreditations and certification</b>                       | 0%  | 2%  | 2%  | 34% | 3%  | 13%  |
| - <b>Institutional governance</b>                               | 25% | 14% | 7%  | 28% | 41% | 919% |
| - <b>Quality improvement</b>                                    | 54% | 26% | 26% | 23% | 15% | 25%  |
| <b>Type of indicator</b>                                        |     |     |     |     |     |      |
| - <b>Structure</b>                                              | 25% | 42% | 33% | 46% | 41% | 36%  |
| - <b>Process</b>                                                | 37% | 28% | 39% | 35% | 38% | 36%  |
| - <b>Outcome</b>                                                | 38% | 24% | 28% | 19% | 21% | 28%  |
| <b>Who is registering</b>                                       |     |     |     |     |     |      |
| - <b>Nurse</b>                                                  | 41% | 27% | 44% | 31% | 62% | 39%  |
| - <b>Physician</b>                                              | 37% | 6%  | 9%  | 35% | 9%  | 19%  |
| - <b>Quality employee</b>                                       | 7%  | 59% | 41% | 7%  | 24% | 30%  |
| - <b>Patient or relative</b>                                    | 11% | 3%  | 1%  | 5%  | 3%  | 4%   |
| - <b>Other (eg, pharmacist)</b>                                 | 4%  | 5%  | 5%  | 22% | 3%  | 7%   |
| <b>Registration useful for quality improvement?<br/>(% yes)</b> | 34% | 48% | 29% | 51% | 62% | 36%  |

**Table S3.** Perceived Reasonability and Usefulness of Quality Registrations (Aggregated Scales and Individual Items)

|                                                                                                          | Never (%)  | Rarely (%)  | Once in a while (%) | Rather often (%) | Frequently (%) |
|----------------------------------------------------------------------------------------------------------|------------|-------------|---------------------|------------------|----------------|
| <b>Unreasonable registrations* (aggregated scale, n=314)</b>                                             | <b>8.6</b> | <b>26.8</b> | <b>46.2</b>         | <b>17.2</b>      | <b>1.3</b>     |
| <i>- should be registered by someone else?</i>                                                           | 10.5       | 20.7        | 36.9                | 26.1             | 5.7            |
| <i>- are going too far, and should not be expected from you?</i>                                         | 11.7       | 27.6        | 34.0                | 22.2             | 4.4            |
| <i>- put you into an awkward position?</i>                                                               | 28.7       | 39.2        | 25.2                | 6.4              | 0.6            |
| <i>- are unfair for you to deal with?</i>                                                                | 13.1       | 33.1        | 32.5                | 18.2             | 3.2            |
| <b>Unnecessary registrations** (aggregated scale, n=313)</b>                                             | <b>6.7</b> | <b>10.5</b> | <b>32.6</b>         | <b>39.3</b>      | <b>10.9</b>    |
| <i>- they need to be done at all?</i>                                                                    | 8.3        | 13.4        | 37.4                | 31.9             | 8.9            |
| <i>- they make any sense at all?</i>                                                                     | 8.3        | 12.8        | 35.5                | 31.0             | 12.5           |
| <i>- they would not exist (or could be done with less effort), if things were organized differently?</i> | 8.3        | 8.0         | 36.3                | 32.8             | 14.6           |
| <i>- they only exist because some people simply demand it this way?</i>                                  | 9.6        | 11.8        | 29.6                | 34.1             | 15             |
| Stem * :Do you register quality information that you believe ...                                         |            |             |                     |                  |                |
| Stem ** :Do you register quality information of which you keep wondering if ...                          |            |             |                     |                  |                |
